# Supplementary material
Source: PubMed Central journal article supplement (PMC6730512)

## **SUPPLEMENTAL MATERIAL**

### **Development and Validation of a Pragmatic Electronic Phenotype for CKD**

Supplemental Table 1: eGFR and UACR LOINC Codes Used in the NKDEP ePhenotype for CKD

Supplemental Table 2: Dialysis Codes Used in the NKDEP ePhenotype for ESKD

Supplemental Table 3: Transplant Codes Used in the NKDEP ePhenotype for ESKD

Supplemental Table 4: Characteristics of the Christiana Care Health System Population

Supplemental Table 5: Characteristics of the Columbia University Population

Supplemental Table 6: Characteristics of the University of California, San Francisco Population

Supplemental Table 7: Characteristics of the University of Minnesota Population

Supplemental Table 8: Characteristics of the University of Utah Population

Supplemental Table 9: Characteristics of the Validation Population

Supplemental Figure 1: Correlation between Same-day UACR and UPCR Results at Three Sites

Supplemental Figure 2: Correlation between Same-day UPCR and UA Results at Three Sites

**Supplemental Table 1: eGFR and UACR LOINC Codes Used in the NKDEP ePhenotype for CKD**

| LOINC Code  | Description                                                                                                                              |
|-------------|------------------------------------------------------------------------------------------------------------------------------------------|
| <b>eGFR</b> |                                                                                                                                          |
| 33914-3     | Glomerular filtration rate/1.73 sq M.predicted [Volume Rate/Area] in Serum or Plasma by Creatinine-based formula (MDRD)                  |
| 48642-3     | Glomerular filtration rate/1.73 sq M predicted among non-blacks [Volume Rate/Area] in Serum or Plasma by Creatinine-based formula (MDRD) |
| 48643-1     | Glomerular filtration rate/1.73 sq M predicted among blacks [Volume Rate/Area] in Serum or Plasma by Creatinine-based formula (MDRD)     |
| 50044-7     | Glomerular filtration rate/1.73 sq M predicted among females [Volume Rate/Area] in Serum or Plasma by Creatinine-based formula (MDRD)    |
| 50210-4     | Glomerular filtration rate/1.73 sq M.predicted [Volume Rate/Area] in Serum or Plasma by Cystatin-based formula                           |
| 62238-1     | Glomerular filtration rate/1.73 sq M.predicted [Volume Rate/Area] in Serum or Plasma by Creatinine-based formula (CKD-EPI)               |
| 69405-9     | Glomerular filtration rate/1.73 sq M.predicted [Volume Rate/Area] in Serum or Plasma                                                     |
| 70969-1     | Glomerular filtration rate/1.73 sq M predicted among males [Volume Rate/Area] in Serum or Plasma by Creatinine-based formula (MDRD)      |
| 76633-7     | Glomerular filtration rate/1.73 sq M. predicted by Creatinine-based formula (MDRD) in Blood                                              |
| 77147-7     | Glomerular filtration rate/1.73 sq M.predicted [Volume Rate/Area] in Serum, Plasma or Blood by Creatinine-based formula (MDRD)           |
| <b>UACR</b> |                                                                                                                                          |
| 44292-1     | Microalbumin/Creatinine [Mass Ratio] in 12 hour Urine                                                                                    |
| 14958-3     | Microalbumin/Creatinine [Mass Ratio] in 24 hour Urine                                                                                    |
| 14959-1     | Microalbumin/Creatinine [Mass Ratio] in Urine                                                                                            |
| 77254-1     | Microalbumin/Creatinine [Ratio] in 24 hour Urine by Detection limit <= 1.0 mg/L                                                          |
| 59159-4     | Microalbumin/Creatinine [Ratio] in 24 hour Urine                                                                                         |
| 77253-3     | Microalbumin/Creatinine [Ratio] in Urine by Detection limit <= 1.0 mg/L                                                                  |
| 30000-4     | Microalbumin/Creatinine [Ratio] in Urine                                                                                                 |
| 30001-2     | Microalbumin/Creatinine [Ratio] in Urine by Test strip                                                                                   |
| 14585-4     | Albumin/Creatinine [Molar ratio] in Urine                                                                                                |
| 13705-9     | Albumin/Creatinine [Mass Ratio] in 24 hour Urine                                                                                         |
| 9318-7      | Albumin/Creatinine [Mass Ratio] in Urine                                                                                                 |
| 14585-4     | Albumin/Creatinine [Molar ratio] in Urine                                                                                                |
| 76401-9     | Albumin/Creatinine [Ratio] in 24 hour Urine                                                                                              |
| 32294-1     | Albumin/Creatinine [Ratio] in Urine                                                                                                      |
| <b>UPCR</b> |                                                                                                                                          |
| 60678-0     | Protein/Creatinine [Mass Ratio] in 12 hour Urine                                                                                         |

*Supplemental material is neither peer-reviewed nor thoroughly edited by CJASN. The authors alone are responsible for the accuracy and presentation of the material.*

|                    |                                                        |
|--------------------|--------------------------------------------------------|
| <b>13801-6</b>     | Protein/Creatinine [Mass Ratio] in 24 hour Urine       |
| <b>2890-2</b>      | Protein/Creatinine [Mass Ratio] in Urine               |
| <b>40486-3</b>     | Protein/Creatinine [Ratio] in 24 hour Urine            |
| <b>34366-5</b>     | Protein/Creatinine [Ratio] in Urine                    |
| <b>UA Dipstick</b> |                                                        |
| <b>50949-7</b>     | Albumin [Presence] in Urine by Test strip              |
| <b>20621-9</b>     | Albumin/Creatinine [Presence] in Urine by Test strip   |
| <b>11218-5</b>     | Microalbumin [Mass/volume] in Urine by Test strip      |
| <b>30001-2</b>     | Microalbumin/Creatinine [Ratio] in Urine by Test strip |

**Supplemental Table 2: Dialysis Codes Used in the NKDEP ePhenotype for ESKD**

| Dialysis Codes      | Description                                                                               |
|---------------------|-------------------------------------------------------------------------------------------|
| <b>CPT codes</b>    |                                                                                           |
| 3066F               | Documentation of treatment for nephropathy                                                |
| 36800, 36810, 36815 | Insertion of cannula for hemodialysis, other purpose...                                   |
| 36818 - 36820       | Arteriovenous anastomosis, open...                                                        |
| 36821, 36831        | Thrombectomy, open, arteriovenous fistula...                                              |
| 36832, 36833        | Revision, open, arteriovenous fistula...                                                  |
| 90935, 90937        | Hemodialysis procedure with single evaluation...                                          |
| 90940               | Hemodialysis access flow study to determine blood flow...                                 |
| 90945, 90947        | Dialysis procedure other than hemodialysis...                                             |
| 90951 - 90962       | ESRD related services monthly...                                                          |
| 90963 - 90966       | ESRD related services for home dialysis per full month...                                 |
| 90967 - 90970       | ESRD related services for dialysis less than a full month...                              |
| 90989, 90993        | Dialysis training, patient, including helper...                                           |
| 90997               | Hemoperfusion                                                                             |
| 90999, 99512        | Unlisted dialysis procedure, inpatient or outpatient...                                   |
| G0257               | Unscheduled or emergency dialysis treatment for an ESRD...                                |
| G9231               | Documentation of ESRD, dialysis, renal transplant...                                      |
| S2065               | Simultaneous pancreas kidney transplantation...                                           |
| S9339               | Home therapy; peritoneal dialysis, administrative...                                      |
| 36145               | Introduction of needle or intracatheter; arteriovenous shunt created for dialysis...      |
| 36147               | Introduction of needle and/or catheter, arteriovenous shunt created for dialysis...       |
| 90918 - 90921       | ESRD related services per full month...                                                   |
| 90925               | ESRD related services (less than full month)...                                           |
| G0308 – G0319       | ESRD related services during the course of treatment...                                   |
| G0320 – G0323       | ESRD related services for home dialysis patients per full month...                        |
| G0324 – G0327       | ESRD related services for home dialysis (less than full month)...                         |
| G0392, G0393        | Transluminal balloon angioplasty, percutaneous; for maintenance of hemodialysis access... |
| <b>ICD-9 Codes</b>  |                                                                                           |
| 38.95               | Venous catheterization for renal dialysis                                                 |
| 39.27               | Arteriovenostomy for renal dialysis                                                       |
| 39.42               | Revision of arteriovenous shunt for renal dialysis                                        |
| 39.53               | Repair of arteriovenous fistula                                                           |
| 39.54               | Re-entry operation (aorta)                                                                |
| 39.95               | Hemodialysis                                                                              |

*Supplemental material is neither peer-reviewed nor thoroughly edited by CJASN. The authors alone are responsible for the accuracy and presentation of the material.*

|                     |                                                            |
|---------------------|------------------------------------------------------------|
| <b>54.98</b>        | Peritoneal dialysis                                        |
| <b>585.6</b>        | End stage renal disease                                    |
| <b>V45.11</b>       | Renal dialysis status                                      |
| <b>V45.12</b>       | Noncompliance with renal dialysis                          |
| <b>V56.0</b>        | Encounter for extracorporeal dialysis                      |
| <b>V56.1</b>        | Fitting and adjustment of extracorporeal dialysis catheter |
| <b>V56.2</b>        | Fitting and adjustment of peritoneal dialysis catheter     |
| <b>V56.31</b>       | Encounter for adequacy testing for hemodialysis            |
| <b>V56.32</b>       | Encounter for adequacy testing for peritoneal dialysis     |
| <b>V56.8</b>        | Encounter for other dialysis                               |
| <b>V45.1</b>        | Postprocedural; renal dialysis status                      |
| <b>ICD-10 Codes</b> |                                                            |
| <b>N18.6</b>        | End stage renal disease                                    |
| <b>Z49</b>          | Encounter for care involving renal dialysis                |
| <b>Z91.15</b>       | Patient's noncompliance with renal dialysis                |
| <b>Z99.2</b>        | Dependence on renal dialysis                               |

**Supplemental Table 3: Transplant Codes Used in the NKDEP ePhenotype for ESKD**

| <b>Transplant Code</b> | <b>Description</b>                                                                                                            |
|------------------------|-------------------------------------------------------------------------------------------------------------------------------|
| <b>CPT Codes</b>       |                                                                                                                               |
| <b>00868</b>           | Anesthesia for extraperitoneal procedures in lower abdomen, including urinary tract; renal transplant (recipient) (units: 10) |
| <b>50340</b>           | Recipient nephrectomy (separate procedure)                                                                                    |
| <b>50360, 50365</b>    | Renal allotransplantation; implantation of graft...                                                                           |
| <b>50380</b>           | Renal autotransplantation, reimplantation of kidney                                                                           |
| <b>ICD-9 Codes</b>     |                                                                                                                               |
| <b>00.91</b>           | Transplant from live related donor...                                                                                         |
| <b>00.92</b>           | Transplant from live non-related donor...                                                                                     |
| <b>00.93</b>           | Transplant from cadaver...                                                                                                    |
| <b>55.51</b>           | Nephroureterectomy                                                                                                            |
| <b>55.52</b>           | Nephrectomy of remaining kidney                                                                                               |
| <b>55.53</b>           | Removal of transplanted or rejected kidney                                                                                    |
| <b>55.54</b>           | Bilateral nephrectomy                                                                                                         |
| <b>55.61</b>           | Renal autotransplantation                                                                                                     |
| <b>55.69</b>           | Other kidney transplantation                                                                                                  |
| <b>V42.0</b>           | Transplant; kidney                                                                                                            |
| <b>Z94.0</b>           | Kidney transplant status                                                                                                      |
| <b>ICD-10 Codes</b>    |                                                                                                                               |
| <b>0TY****</b>         | Surgical or Medical / Urinary System / Transplantation / Kidney                                                               |

**Supplemental Table 4: Characteristics of the Christiana Health Care System Population**

|                            | Total Population |       | Group 1: No eGFR |       | Group 2: eGFR >= 60 |       | Group 3: eGFR 45-60 |       | Group 4: eGFR 30-45 |       | Group 5: eGFR 15-30 |       | Group 6: eGFR < 15 |       |
|----------------------------|------------------|-------|------------------|-------|---------------------|-------|---------------------|-------|---------------------|-------|---------------------|-------|--------------------|-------|
|                            | N                | % /SD | N                | % /SD | N                   | % /SD | N                   | % /SD | N                   | % /SD | N                   | % /SD | N                  | % /SD |
| Number                     | 380,190          |       | 152,954          |       | 198,087             |       | 16,429              |       | 7,279               |       | 3,327               |       | ,114               |       |
| Age, years                 | 50               | 19    | 44               | 18    | 52                  | 17    | 71                  | 15    | 74                  | 14    | 73                  | 15    | 65                 | 15    |
| Female                     | 228,815          | 60%   | 93,382           | 61%   | 118,826             | 60%   | 9,534               | 58%   | 4,299               | 59%   | 1,818               | 55%   | 956                | 45%   |
| Black                      | 87,976           | 23%   | 31,917           | 21%   | 50,002              | 25%   | 2,893               | 18%   | 1,408               | 19%   | 818                 | 25%   | 938                | 44%   |
| Num eGFR measurements      | 5                | 7     | N/A              | N/A   | 4                   | 6     | 7                   | 9     | 9                   | 11    | 10                  | 12    | 12                 | 17    |
| Days to most recent eGFR   | 537              | 549   | N/A              | N/A   | 554                 | 554   | 435                 | 522   | 391                 | 463   | 415                 | 463   | 425                | 466   |
| Prior eGFR <60             | 22,604           | 6%    | N/A              | N/A   | 6,051               | 3%    | 7,413               | 45%   | 5,009               | 69%   | 2,480               | 75%   | 1,651              | 78%   |
| Prior GFR <60 90+d prior   | 20,349           | 5%    | N/A              | N/A   | 5,446               | 3%    | 6,658               | 41%   | 4,496               | 62%   | 2,229               | 67%   | 1,520              | 72%   |
| Any UACR, UPCR, or UA      | 122,696          | 32%   | 20,899           | 14%   | 88,006              | 44%   | 7,312               | 45%   | 3,661               | 50%   | 1,806               | 54%   | 1,012              | 48%   |
| Any UACR                   | 30,911           | 8%    | 111              | 0.1%  | 24,700              | 13%   | 3,318               | 20%   | 1,722               | 24%   | 733                 | 22%   | 327                | 16%   |
| Num UACR measurements      | 2.8              | 2.3   | 1.2              | 0.8   | 2.7                 | 2.2   | 3.3                 | 2.6   | 3.4                 | 2.9   | 2.9                 | 2.6   | 2.4                | 2.3   |
| Most recent UACR:          |                  |       |                  |       |                     |       |                     |       |                     |       |                     |       |                    |       |
| a <30mg/g                  | 22,958           | 76%   | 85               | 77%   | 19,793              | 80%   | 2,079               | 63%   | 804                 | 47%   | 172                 | 24%   | 25                 | 8%    |
| b 30 to 300mg/g            | 5,892            | 20%   | 22               | 19%   | 4,121               | 17%   | 896                 | 27%   | 572                 | 33%   | 219                 | 30%   | 62                 | 19%   |
| c >300mg/g                 | 2,061            | 7%    | 4                | 4%    | 786                 | 3%    | 343                 | 10%   | 346                 | 20%   | 342                 | 47%   | 240                | 73%   |
| Any UPCR                   | 6,218            | 2%    | 122              | 0.1%  | 4,010               | 2%    | 633                 | 4%    | 645                 | 9%    | 538                 | 16%   | 270                | 13%   |
| Num UPCR measurements      | 3.0              | 6.6   | 1.3              | 0.6   | 2.3                 | 5.0   | 4.7                 | 9.9   | 5.0                 | 9.4   | 4.0                 | 7.2   | 4.3                | 8.2   |
| Most recent UPCR:          |                  |       |                  |       |                     |       |                     |       |                     |       |                     |       |                    |       |
| a <150mg/g                 | 2,833            | 46%   | 61               | 50%   | 2,111               | 53%   | 322                 | 51%   | 234                 | 36%   | 88                  | 16%   | 17                 | 6%    |
| b 150 to 500mg/g           | 1,711            | 28%   | 31               | 25%   | 1,177               | 29%   | 144                 | 23%   | 195                 | 30%   | 135                 | 25%   | 29                 | 11%   |
| c >500mg/g                 | 1,674            | 27%   | 30               | 24%   | 722                 | 18%   | 167                 | 26%   | 216                 | 34%   | 315                 | 59%   | 224                | 83%   |
| Any UA                     | 94,260           | 25%   | 20,156           | 13%   | 66,319              | 34%   | 4,499               | 27%   | 2,016               | 28%   | 836                 | 25%   | 434                | 21%   |
| Num UA measurements        | 2.5              | 3.2   | 2.4              | 3.0   | 2.6                 | 3.2   | 2.4                 | 3.0   | 2.27                | 2.7   | 2.1                 | 2.2   | 1.97               | 1.92  |
| Most recent UA:            |                  |       |                  |       |                     |       |                     |       |                     |       |                     |       |                    |       |
| a Neg                      | 62,342           | 66%   | 13,864           | 69%   | 44,598              | 67%   | 2,621               | 58%   | 940                 | 47%   | 263                 | 32%   | 56                 | 13%   |
| b Trace to 30 (Trace, 1+)  | 22,234           | 24%   | 4,691            | 23%   | 15,583              | 24%   | 1,159               | 26%   | 554                 | 28%   | 192                 | 23%   | 55                 | 13%   |
| c 100 to >300 (2+, 3+, 4+) | 9,395            | 10%   | 1,585            | 8%    | 5,965               | 9%    | 691                 | 15%   | 493                 | 25%   | 354                 | 42%   | 307                | 71%   |
| Dialysis                   | 2,716            | 0.7%  | 131              | 0.1%  | 357                 | 0.2%  | 159                 | 1%    | 213                 | 3%    | 459                 | 14%   | 1,397              | 66%   |
| Transplant                 | 635              | 0.2%  | 25               | 0.02% | 216                 | 0.1%  | 101                 | 0.6%  | 115                 | 2%    | 80                  | 2%    | 98                 | 5%    |

**Supplemental Table 5: Characteristics of the Columbia University Population**

|                                  | Total Population |        | Group 1: No eGFR |       | Group 2: eGFR >= 60 |        | Group 3: eGFR 45-60 |       | Group 4: eGFR 30-45 |       | Group 5: eGFR 15-30 |       | Group 6: eGFR < 15 |       |
|----------------------------------|------------------|--------|------------------|-------|---------------------|--------|---------------------|-------|---------------------|-------|---------------------|-------|--------------------|-------|
|                                  | N                | % / SD | N                | % /SD | N                   | % / SD | N                   | % /SD | N                   | % /SD | N                   | % /SD | N                  | % /SD |
| Number                           | 338,868          |        | 107,977          |       | 196,364             |        | 18,902              |       | 8819                |       | 3760                |       | 3046               |       |
| Age, years                       | 49               | 20     | 40               | 18    | 50                  | 18     | 72                  | 13    | 74                  | 13    | 72                  | 15    | 62                 | 16    |
| Female                           | 202,289          | 60%    | 65,274           | 61%   | 119,481             | 61%    | 9860                | 52%   | 4456                | 51%   | 1873                | 50%   | 1345               | 44%   |
| Black                            | 27,687           | 8%     | 7595             | 7%    | 17,035              | 9%     | 1326                | 7%    | 751                 | 9%    | 427                 | 11%   | 553                | 18%   |
| Num eGFR measurements            | 9                | 28     | N/A              | N/A   | 10                  | 23     | 25                  | 44    | 40                  | 66    | 55                  | 77    | 59                 | 95    |
| Days to most recent eGFR         | 665              | 1152   | N/A              | N/A   | 720                 | 1209   | 388                 | 753   | 286                 | 529   | 262                 | 484   | 389                | 591   |
| Prior eGFR <60                   | 28,120           | 8%     | N/A              | N/A   | 4923                | 3%     | 10,109              | 54%   | 7386                | 84%   | 3323                | 88%   | 2379               | 78%   |
| Prior GFR <60 at least 90d prior | 16,656           | 5%     | N/A              | N/A   | 2671                | 1%     | 5573                | 30%   | 4306                | 49%   | 2332                | 62%   | 1774               | 58%   |
| Any UACR, UPCR, or UA            | 176,656          | 52%    | 17,876           | 17%   | 132,779             | 68%    | 13,734              | 73%   | 6846                | 78%   | 3116                | 83%   | 2305               | 76%   |
| Any UACR                         | 18,139           | 5%     | 101              | 0.1%  | 11,810              | 6%     | 2811                | 15%   | 1818                | 21%   | 987                 | 26%   | 612                | 20%   |
| Num UACR measurements            | 0.2              | 1.2    | 0.0              | 0.0   | 0.2                 | 1.2    | 0.6                 | 2.3   | 0.9                 | 3.0   | 1.0                 | 3.2   | 0.6                | 2.2   |
| Most recent UACR:                |                  |        |                  |       |                     |        |                     |       |                     |       |                     |       |                    |       |
| a <30mg/g                        | 12,121           | 67%    | 63               | 62%   | 9119                | 77%    | 1786                | 64%   | 854                 | 47%   | 247                 | 25%   | 52                 | 9%    |
| b 30 to 300mg/g                  | 4068             | 22%    | 26               | 26%   | 2184                | 19%    | 763                 | 27%   | 628                 | 35%   | 338                 | 34%   | 129                | 21%   |
| c >300mg/g                       | 1950             | 11%    | 12               | 12%   | 507                 | 4%     | 262                 | 9%    | 336                 | 19%   | 402                 | 41%   | 431                | 70%   |
| Any UPCR                         | 21,375           | 6%     | 289              | 0.3%  | 12,617              | 6%     | 2975                | 16%   | 2614                | 30%   | 1682                | 45%   | 1198               | 39%   |
| Num UPCR measurements            | 0.2              | 1.7    | 0.0              | 0.1   | 0.2                 | 1.6    | 0.5                 | 2.5   | 1.1                 | 3.9   | 2.0                 | 5.4   | 2.0                | 5.8   |
| Most recent UPCR:                |                  |        |                  |       |                     |        |                     |       |                     |       |                     |       |                    |       |
| a <150mg/g                       | 10,270           | 48%    | 207              | 72%   | 7238                | 57%    | 1496                | 50%   | 995                 | 38%   | 290                 | 17%   | 44                 | 4%    |
| b 150 to 500mg/g                 | 6122             | 29%    | 44.0             | 15%   | 3650                | 29%    | 896                 | 30%   | 869                 | 33%   | 520                 | 31%   | 143                | 12%   |
| c >500mg/g                       | 4983             | 23%    | 38               | 13%   | 1729                | 14%    | 583                 | 20%   | 750                 | 29%   | 872                 | 52%   | 1011               | 84%   |
| Any UA                           | 173,419          | 51%    | 17,659           | 16%   | 130,353             | 66%    | 13,420              | 71%   | 6691                | 76%   | 3025                | 81%   | 2271               | 75%   |
| Num UA measurements              | 2.5              | 6.2    | 0.3              | 1.0   | 3.2                 | 6.6    | 4.7                 | 8.8   | 6.2                 | 10.2  | 7.7                 | 12.4  | 6.9                | 12.6  |
| Most recent UA:                  |                  |        |                  |       |                     |        |                     |       |                     |       |                     |       |                    |       |



Supplemental material is neither peer-reviewed nor thoroughly edited by CJASN. The authors alone are responsible for the accuracy and presentation of the material.

|                            |         |      |        |      |         |      |      |     |      |     |      |     |      |     |
|----------------------------|---------|------|--------|------|---------|------|------|-----|------|-----|------|-----|------|-----|
| a Neg                      | 133,323 | 77%  | 14,188 | 80%  | 103,959 | 80%  | 9733 | 73% | 4096 | 61% | 1157 | 38% | 190  | 8%  |
| b Trace to 30 (Trace, 1+)  | 27,620  | 16%  | 2745   | 16%  | 20,003  | 15%  | 2395 | 18% | 1405 | 21% | 736  | 24% | 336  | 15% |
| c 100 to >300 (2+, 3+, 4+) | 12,476  | 7%   | 726    | 4%   | 6391    | 5%   | 1292 | 10% | 1190 | 18% | 1132 | 37% | 1745 | 77% |
| Dialysis                   | 4575    | 1%   | 58     | 0.1% | 715     | 0.4% | 596  | 3%  | 672  | 8%  | 644  | 17% | 1890 | 62% |
| Transplant                 | 2942    | 0.9% | 6      | 0.0% | 851     | 0.4% | 670  | 4%  | 684  | 8%  | 389  | 10% | 342  | 11% |
| Diabetes                   | 29,614  | 9%   | 1159   | 1%   | 20,413  | 10%  | 3499 | 19% | 2391 | 27% | 1255 | 33% | 897  | 29% |
| Hypertension               | 47,658  | 14%  | 397    | 0.4% | 33,054  | 17%  | 7522 | 40% | 4064 | 46% | 1658 | 44% | 963  | 32% |

**Supplemental Table 6: Characteristics of the University of California, San Francisco Population**

|                                  | Total Population  |       | Group 1: No eGFR  |       | Group 2: eGFR >= 60 |       | Group 3: eGFR 45-60 |       | Group 4: eGFR 30-45 |       | Group 5: eGFR 15-30 |       | Group 6: eGFR < 15 |       |
|----------------------------------|-------------------|-------|-------------------|-------|---------------------|-------|---------------------|-------|---------------------|-------|---------------------|-------|--------------------|-------|
|                                  | N                 | % /SD | N                 | % /SD | N                   | % /SD | N                   | % /SD | N                   | % /SD | N                   | % /SD | N                  | % /SD |
| Number                           | 311,122           |       | 184,317           |       | 112,237             |       | 8411                |       | 3497                |       | 1474                |       | 1186               |       |
| Age, years                       | 51<br>(n=311,087) | 18    | 48<br>(n=184,291) | 18    | 53<br>(n=112231)    | 17    | 70                  | 14    | 71<br>(n=3495)      | 15    | 68                  | 16    | 59                 | 16    |
| Female                           | 179,455           | 58%   | 109,822           | 60%   | 62,429              | 56%   | 4173                | 50%   | 1786                | 51%   | 735                 | 50%   | 510                | 43%   |
| Black                            | 16,181            | 5%    | 7195              | 4%    | 7730                | 7%    | 560                 | 7%    | 294                 | 8%    | 165                 | 11%   | 237                | 20%   |
| Num eGFR measurements            | 4                 | 15    | N/A               | N/A   | 9                   | 19    | 17                  | 29    | 25                  | 38    | 29                  | 39    | 32                 | 44    |
| Days to most recent eGFR         | 572               | 696   | N/A               | N/A   | 585                 | 701   | 511                 | 685   | 435                 | 622   | 387                 | 576   | 420                | 559   |
| Prior eGFR <60                   | 23,902            | 8%    | N/A               | N/A   | 12,550              | 11%   | 6035                | 72%   | 2993                | 86%   | 1301                | 88%   | 1023               | 86%   |
| Prior GFR <60 at least 90d prior | 11,840            | 5%    | N/A               | N/A   | 4520                | 4%    | 3730                | 44%   | 2061                | 59%   | 870                 | 59%   | 659                | 56%   |
| Any UACR, UPCR, or UA            | 62,850            | 20%   | 7294              | 4%    | 46,416              | 41%   | 4980                | 59%   | 2384                | 68%   | 1064                | 72%   | 712                | 60%   |
| Any UACR                         | 8966              | 3%    | 392               | 0.2%  | 6208                | 6%    | 1145                | 14%   | 681                 | 20%   | 337                 | 23%   | 203                | 17%   |
| Num UACR measurements            | 3.5               | 4.3   | 2.0               | 1.5   | 3.2                 | 3.6   | 4.1                 | 5.0   | 4.7                 | 5.4   | 6.5                 | 7.7   | 5.4                | 6.6   |
| Most recent UACR:                |                   |       |                   |       |                     |       |                     |       |                     |       |                     |       |                    |       |
| a <30mg/g                        | 6293              | 70%   | 338               | 86%   | 4833                | 78%   | 720                 | 63%   | 312                 | 46%   | 77                  | 23%   | 13                 | 6%    |
| b 30 to 300mg/g                  | 1817              | 20%   | 38                | 10%   | 1073                | 17%   | 315                 | 28%   | 233                 | 34%   | 117                 | 35%   | 41                 | 20%   |
| c >300mg/g                       | 856               | 10%   | 16                | 4%    | 302                 | 5%    | 110                 | 10%   | 136                 | 20%   | 143                 | 42%   | 149                | 73%   |
| Any UPCR                         | 11,716            | 4%    | 228               | 0.1%  | 7484                | 7%    | 1635                | 19%   | 1212                | 35%   | 720                 | 49%   | 437                | 37%   |
| Num UPCR measurements            | 3.7               | 5.2   | 2.7               | 6.3   | 3.2                 | 4.9   | 4.1                 | 5.2   | 4.6                 | 5.5   | 5.6                 | 6.3   | 5.3                | 5.8   |
| Most recent UPCR:                |                   |       |                   |       |                     |       |                     |       |                     |       |                     |       |                    |       |
| a <150mg/g                       | 4878              | 42%   | 122               | 54%   | 3623                | 48%   | 684                 | 42%   | 364                 | 30%   | 74                  | 10%   | 11                 | 3%    |
| b 150 to 500mg/g                 | 4211              | 36%   | 62                | 27%   | 2822                | 38%   | 617                 | 38%   | 451                 | 37%   | 204                 | 28%   | 55                 | 13%   |
| c >500mg/g                       | 2627              | 22%   | 44                | 19%   | 1039                | 14%   | 334                 | 20%   | 397                 | 33%   | 442                 | 61%   | 371                | 85%   |
| Any UA                           | 57,547            | 19%   | 6984              | 4%    | 42,256              | 38%   | 4572                | 54%   | 2164                | 62%   | 932                 | 63%   | 639                | 54%   |
| Num UA measurements              | 3.3               | 5.7   | 1.8               | 2.7   | 3.1                 | 5.3   | 4.4                 | 6.8   | 5.5                 | 8.5   | 6.5                 | 9.2   | 9.0                | 14.7  |
| Most recent UA:                  |                   |       |                   |       |                     |       |                     |       |                     |       |                     |       |                    |       |
| a Neg                            | 48,173            | 84%   | 6036              | 86%   | 36,723              | 87%   | 3454                | 76%   | 1390                | 64%   | 432                 | 46%   | 138                | 22%   |
| b Trace to 30 (Trace, 1+)        | 8396              | 15%   | 841               | 12%   | 5117                | 12%   | 1004                | 22%   | 690                 | 32%   | 410                 | 44%   | 334                | 52%   |
| c 100 to >300 (2+, 3+, 4+)       | 978               | 2%    | 107               | 2%    | 416                 | 1%    | 114                 | 3%    | 84                  | 4%    | 90                  | 10%   | 167                | 26%   |
| Dialysis                         | 11,517            | 4%    | 3316              | 2%    | 2766                | 3%    | 1773                | 21%   | 1525                | 44%   | 1020                | 69%   | 1117               | 94%   |
| Transplant                       | 4646              | 2%    | 541               | 0.3%  | 2105                | 2%    | 865                 | 10%   | 574                 | 16%   | 304                 | 21%   | 257                | 22%   |

**Supplemental Table 7: Characteristics of the University of Minnesota Population**

|                                  | TOTAL POPULATION |       | Group 1: No eGFR |       | Group 2: eGFR >= 60 |       | Group 3: eGFR 45-60 |       | Group 4: eGFR 30-45 |       | Group 5: eGFR 15-30 |       | Group 6: eGFR < 15 |       |
|----------------------------------|------------------|-------|------------------|-------|---------------------|-------|---------------------|-------|---------------------|-------|---------------------|-------|--------------------|-------|
|                                  | N                | % /SD | N                | % /SD | N                   | % /SD | N                   | % /SD | N                   | % /SD | N                   | % /SD | N                  | % /SD |
| Number                           | 650,154          |       | 238,989          |       | 367,115             |       | 29,705              |       | 9498                |       | 2,845               |       | 2,002              |       |
| Age, years                       | 49               | 18    | 44               | 17    | 50                  | 17    | 70                  | 14    | 74                  | 14    | 70                  | 16    | 60                 | 16    |
| Female                           | 375,510          | 8%    | 140,669          | 59%   | 208,504             | 57%   | 18,070              | 61%   | 5811                | 61%   | 1,569               | 55%   | 887                | 44%   |
| Black                            | 43,371           | 7%    | 14,972           | 6%    | 26,969              | 7%    | 697                 | 2%    | 264                 | 3%    | 171                 | 6%    | 297                | 15%   |
| Num eGFR measurements            | 9                | 18    | N/A              | N/A   | 7                   | 14    | 17                  | 28    | 28                  | 43    | 37                  | 54    | 34                 | 63    |
| Days to most recent eGFR         | 716              | 907   | N/A              | N/A   | 741                 | 915   | 526                 | 822   | 411                 | 693   | 462                 | 742   | 770                | 1012  |
| Prior eGFR <60                   | 80,610           | 12%   | N/A              | N/A   | 46102               | 13%   | 21,954              | 74%   | 8509                | 90%   | 2512                | 88%   | 1533               | 77%   |
| Prior GFR <60 at least 90d prior | 73,634           | 11%   | N/A              | N/A   | 41979               | 11%   | 20222               | 68%   | 7828                | 82%   | 2267                | 80%   | 1338               | 67%   |
| Any UACR, UPCR, or UA            | 320,068          | 49%   | 37,952           | 16%   | 247,014             | 67%   | 23,008              | 78%   | 8023                | 85%   | 2494                | 88%   | 1,577              | 79%   |
| Any UACR                         | 61,080           | 9%    | 277              | 0.1%  | 45,918              | 13%   | 8888                | 30%   | 4049                | 43%   | 1273                | 45%   | 675                | 34%   |
| Num UACR measurements            | 3                | 2.7   | 1.4              | 1.1   | 2.9                 | 2.5   | 3.4                 | 2.9   | 3.9                 | 3.3   | 4.0                 | 3.6   | 3.3                | 4.3   |
| Most recent UACR:                |                  |       |                  |       |                     |       |                     |       |                     |       |                     |       |                    |       |
| a <30mg/g                        | 44,515           | 73%   | 221              | 80%   | 36,082              | 79%   | ,827                | 66%   | 2027                | 50%   | 322                 | 25%   | 36                 | 5%    |
| b 30 to 300mg/g                  | 12,561           | 21%   | 42               | 15%   | 8250                | 18%   | 2329                | 26%   | 1361                | 34%   | 452                 | 36%   | 127                | 19%   |
| c >300mg/g                       | 4004             | 7%    | 14               | 5%    | 1586                | 4%    | 732                 | 8%    | 661                 | 16%   | 499                 | 39%   | 512                | 76%   |
| Any UPCR                         | 18,092           | 3%    | 258              | 0.1%  | 11,232              | 3%    | 2717                | 9%    | 2012                | 21%   | 1109                | 39%   | 764                | 38%   |
| Num UPCR measurements            | 3.7              | 6.2   | 1.4              | 1.0   | 2.9                 | 4.9   | 4.4                 | 6.3   | 5.4                 | 10.0  | 5.8                 | 7.7   | 4.9                | 6.7   |
| Most recent UPCR:                |                  |       |                  |       |                     |       |                     |       |                     |       |                     |       |                    |       |
| a <150mg/g                       | 8,197            | 45%   | 108              | 42%   | 5789                | 52%   | 1388                | 51%   | 713                 | 35%   | 168                 | 15%   | 31                 | 4%    |
| b 150 to 500mg/g                 | 5984             | 33%   | 108              | 42%   | 3888                | 35%   | 860                 | 32%   | 713                 | 35%   | 340                 | 31%   | 75                 | 10%   |
| c >500mg/g                       | 3911             | 22%   | 42               | 16%   | 1555                | 14%   | 469                 | 17%   | 586                 | 29%   | 601                 | 54%   | 658                | 86%   |
| Any UA                           | 307,324          | 47%   | 37,732           | 16%   | 236,288             | 64%   | 21,767              | 73%   | 7625                | 80%   | 2385                | 84%   | 1527               | 76%   |
| Num UA measurements              | 4                | 5.7   | 2.3              | 3.2   | 4.1                 | 5.7   | 5.1                 | 6.8   | 6.3                 | 7.8   | 7.1                 | 9.4   | 5.9                | 9.9   |
| Most recent UA:                  |                  |       |                  |       |                     |       |                     |       |                     |       |                     |       |                    |       |
| a Neg                            | 251,592          | 82%   | 30,861           | 82%   | 197,657             | 84%   | 16,768              | 77%   | 5062                | 66%   | 1093                | 46%   | 151                | 10%   |
| b Trace to 30 (Trace, 1+)        | 41,182           | 13%   | 5091             | 14%   | 30,159              | 13%   | 3502                | 16%   | 1602                | 21%   | 568                 | 24%   | 260                | 17%   |
| c 100 to >300 (2+, 3+, 4+)       | 14,550           | 5%    | 1780             | 5%    | 8472                | 4%    | 1497                | 7%    | 961                 | 13%   | 724                 | 30%   | 1116               | 73%   |
| Dialysis                         | 4217             | 0.6%  | 183              | 0.1%  | 780                 | 0.2%  | 556                 | 2%    | 454                 | 5%    | 614                 | 22%   | 1630               | 81%   |
| Transplant                       | 2973             | 0.5%  | 94               | 0.04% | 919                 | 0.3%  | 723                 | 2%    | 574                 | 6%    | 331                 | 12%   | 332                | 17%   |
| Diabetes                         | 58,224           | 9%    | 4343             | 2%    | 41,273              | 11%   | 6848                | 23%   | 3439                | 36%   | 1330                | 47%   | 991                | 50%   |
| Hypertension                     | 163,280          | 25%   | 9675             | 4%    | 121,556             | 33%   | 20,075              | 68%   | 7781                | 82%   | 2464                | 87%   | 1729               | 86%   |

**Supplemental Table 8: Characteristics of the University of Utah Population**

|                                  | TOTAL POPULATION |       | Group 1: No eGFR |       | Group 2: eGFR >= 60 |       | Group 3: eGFR 45-60 |       | Group 4: eGFR 30-45 |       | Group 5: eGFR 15-30 |       | Group 6: eGFR < 15 |       |
|----------------------------------|------------------|-------|------------------|-------|---------------------|-------|---------------------|-------|---------------------|-------|---------------------|-------|--------------------|-------|
|                                  | N                | % /SD | N                | % /SD | N                   | % /SD | N                   | % /SD | N                   | % /SD | N                   | % /SD | N                  | % /SD |
| Number                           | 401,683          |       | 255,986          |       | 127,410             |       | 10,901              |       | 4952                |       | 1603                |       | 822                |       |
| Age, years                       | 48               | 19    | 46               | 19    | 49                  | 17    | 70                  | 13    | 73                  | 13    | 71                  | 15    | 60                 | 15    |
| Female                           | 223,211          | 56%   | 140,387          | 55%   | 72,558              | 57%   | 6249                | 5%    | 2802                | 57%   | 859                 | 54%   | 351                | 43%   |
| Black                            | 6527             | 2%    | 3802             | 2%    | 2531                | 2%    | 91                  | 0.8%  | 51                  | 1%    | 22                  | 1%    | 30                 | 4%    |
| Num eGFR measurements            | 2                | 5     | 0                | 0     | 4                   | 7     | 7                   | 12    | 10                  | 14    | 11                  | 15    | 11                 | 17    |
| Days to most recent eGFR         | 457              | 535   | NA               | NA    | 476                 | 546   | 369                 | 460   | 262                 | 361   | 226                 | 337   | 359                | 512   |
| Prior eGFR <60                   | 22863            | 6%    | NA               | NA    | 10186               | 8%    | 6703                | 62%   | 4008                | 81%   | 1344                | 84%   | 613                | 75%   |
| Prior GFR <60 at least 90d prior | 21,008           | 5%    | NA               | NA    | 9333                | 7%    | 6160                | 57%   | 3698                | 75%   | 1243                | 78%   | 573                | 70%   |
| Any UACR, UPCR, or UA            | 129,192          | 32%   | 44,223           | 17%   | 71,721              | 56%   | 7271                | 67%   | 3875                | 78%   | 1397                | 87%   | 699                | 85%   |
| Any UACR                         | 21,160           | 5%    | 1370             | 0.5%  | 14,222              | 11%   | 2596                | 24%   | 1954                | 40%   | 743                 | 46%   | 273                | 33%   |
| Num UACR measurements            | 0.1              | 0.8   | 0                | 0.2   | 0.3                 | 1.1   | 0.7                 | 1.8   | 1.4                 | 2.3   | 1.7                 | 2.7   | 1.0                | 2.1   |
| Most recent UACR:                |                  |       |                  |       |                     |       |                     |       |                     |       |                     |       |                    |       |
| a <30mg/g                        | 15,250           | 72%   | 1066             | 78%   | 11,188              | 79%   | 1727                | 67%   | 1036                | 53%   | 212                 | 29%   | 20                 | 7%    |
| b 30 to 300mg/g                  | 4299             | 20%   | 229              | 17%   | 2477                | 17%   | 660                 | 25%   | 626                 | 32%   | 254                 | 34%   | 53                 | 19%   |
| c >300mg/g                       | 1611             | 8%    | 75               | 6%    | 557                 | 4%    | 209                 | 8%    | 292                 | 15%   | 277                 | 37%   | 200                | 73%   |
| Any UPCR                         | 10,730           | 3%    | 1013             | 0.4%  | 6303                | 5%    | 1285                | 12%   | 1175                | 24%   | 624                 | 39%   | 329                | 40%   |
| Num UPCR measurements            | 0.1              | 1.0   | 0.0              | 0.1   | 0.1                 | 1.0   | 0.4                 | 2.1   | 0.9                 | 3.0   | 1.5                 | 3.8   | 2.3                | 11.0  |
| Most recent UPCR:                |                  |       |                  |       |                     |       |                     |       |                     |       |                     |       |                    |       |
| a <150mg/g                       | 4754             | 44%   | 340              | 34%   | 2994                | 48%   | 710                 | 55%   | 514                 | 44%   | 160                 | 26%   | 35                 | 11%   |
| b 150 to 500mg/g                 | 3924             | 37%   | 393              | 39%   | 2490                | 40%   | 390                 | 30%   | 411                 | 35%   | 199                 | 32%   | 41                 | 13%   |
| c >500mg/g                       | 2052             | 19%   | 280              | 28%   | 819                 | 13%   | 185                 | 14%   | 250                 | 21%   | 265                 | 43%   | 253                | 77%   |
| Any UA                           | 121,829          | 30%   | 43,261           | 17%   | 66,545              | 52%   | 6594                | 61%   | 3471                | 70%   | 1283                | 80%   | 670                | 82%   |
| Num UA measurements              | 1                | 3.6   | 0.3              | 1.2   | 2                   | 4.8   | 3.3                 | 7.8   | 4.5                 | 9.6   | 5.6                 | 10.5  | 6.8                | 16.5  |
| Most recent UA:                  |                  |       |                  |       |                     |       |                     |       |                     |       |                     |       |                    |       |
| a Neg                            | 94,182           | 77%   | 32,804           | 76%   | 53,668              | 81%   | 4848                | 74%   | 2229                | 64%   | 571                 | 45%   | 59                 | 9%    |
| b Trace to 30 (Trace, 1+)        | 19,438           | 16%   | 7583             | 18%   | 9576                | 14%   | 1166                | 18%   | 726                 | 21%   | 300                 | 23%   | 86                 | 13%   |
| c 100 to >300 (2+, 3+, 4+)       | 8209             | 7%    | 2874             | 7%    | 3301                | 5%    | 580                 | 9%    | 516                 | 15%   | 412                 | 32%   | 525                | 78%   |
| Dialysis                         | 3741             | 0.9%  | 874              | 0.3%  | ,078                | 0.8%  | 434                 | 4%    | 394                 | 8%    | 322                 | 20%   | 638                | 78%   |
| Transplant                       | 1569             | 0.4%  | 144              | 0.1%  | 727                 | 0.6%  | 340                 | 3%    | 219                 | 4%    | 78                  | 5%    | 60                 | 7%    |
| Diabetes                         | 43,122           | 11%   | 15,724           | 6%    | 20,599              | 16%   | 3241                | 30%   | 2206                | 45%   | 845                 | 53%   | 506                | 62%   |
| Hypertension                     | 93,805           | 23%   | 33,301           | 13%   | 46,166              | 36%   | 7782                | 71%   | 4328                | 87%   | 1461                | 91%   | 1461               | 91%   |

**Supplemental Table 9: Characteristics of the Validation Population**

|                            | Total Population |        | Group 1: No eGFR |        | Group 2: eGFR >= 60 |        | Group 3: eGFR 45-60 |        | Group 4: eGFR 30-45 |        | Group 5: eGFR 15-30 |        | Group 6: eGFR < 15 |        |
|----------------------------|------------------|--------|------------------|--------|---------------------|--------|---------------------|--------|---------------------|--------|---------------------|--------|--------------------|--------|
|                            | N                | % / SD | N                | % / SD | N                   | % / SD | N                   | % / SD | N                   | % / SD | N                   | % / SD | N                  | % / SD |
| Number                     | 1,680,334        |        | 684,237          |        | 873,803             |        | 73,447              |        | 29,093              |        | 11,406              |        | 8348               |        |
| Age, years                 | 50               | 19     | 44               | 18     | 51                  | 17     | 70                  | 14     | 74                  | 14     | 71                  | 15     | 62                 | 16     |
| Female                     | 986,069          | 59%    | 409,147          | 60%    | 509,240             | 58%    | 41,637              | 57%    | 16,352              | 56%    | 5995                | 53%    | 3698               | 44%    |
| Black                      | 175,215          | 10%    | 61,679           | 9%     | 101,736             | 12%    | 5,476               | 8%     | 2717                | 9%     | 1581                | 14%    | 2025               | 24%    |
| Num eGFR measurements      | 7                | 18     | N/A              | N/A    | 7                   | 16     | 17                  | 31     | 27                  | 47     | 34                  | 57     | 37                 | 70     |
| Days to most recent eGFR   | 639              | 866    | N/A              | N/A    | 674                 | 905    | 468                 | 733    | 371                 | 587    | 373                 | 571    | 494                | 642    |
| Prior eGFR <60             | 155,236          | 9%     | N/A              | N/A    | 69,626              | 8%     | 45,511              | 62%    | 23,897              | 82%    | 9616                | 84%    | 6586               | 79%    |
| Prior GFR <60 90+d prior   | 122,479          | 7%     | N/A              | N/A    | 54,616              | 6%     | 36,183              | 49%    | 18,691              | 64%    | 7698                | 68%    | 5291               | 63%    |
| Any UACR, UPCR, or UA      | 682,270          | 41%    | 84,021           | 12%    | 514,215             | 59%    | 49,034              | 67%    | 20,914              | 72%    | 8480                | 74%    | 5606               | 67%    |
| Any UACR                   | 118,363          | 7%     | 881              | 0.1%   | 88,636              | 10%    | 16,162              | 22%    | 8270                | 28%    | 3330                | 29%    | 1817               | 22%    |
| Num UACR measurements      | 2.5              | 3.0    | 1.3              | 1.2    | 2.3                 | 2.7    | 2.7                 | 3.3    | 3.0                 | 3.7    | 3.0                 | 4.4    | 2.4                | 4.0    |
| Most recent UACR:          |                  |        |                  |        |                     |        |                     |        |                     |        |                     |        |                    |        |
| a <30mg/g                  | 85,887           | 73%    | 707              | 80%    | 69,827              | 79%    | 10,412              | 64%    | 3997                | 48%    | 818                 | 25%    | 126                | 3%     |
| b 30 to 300mg/g            | 24,338           | 21%    | 128              | 15%    | 15,628              | 18%    | 4303                | 27%    | 2794                | 34%    | 1126                | 34%    | 359                | 8%     |
| c >300mg/g                 | 8871             | 8%     | 46               | 5%     | 3181                | 4%     | 1447                | 9%     | 1479                | 18%    | 1386                | 42%    | 1332               | 29%    |
| Any UPCR                   | 57,401           | 3%     | 897              | 0.1%   | 35,343              | 4%     | 7960                | 11%    | 6483                | 22%    | 4049                | 36%    | 2669               | 32%    |
| Num UPCR measurements      | 2.8              | 5.7    | 1.3              | 3.4    | 2.2                 | 4.5    | 3.4                 | 6.7    | 3.9                 | 8.2    | 4.0                 | 6.9    | 3.7                | 6.8    |
| Most recent UPCR:          |                  |        |                  |        |                     |        |                     |        |                     |        |                     |        |                    |        |
| a <150mg/g                 | 26,178           | 46%    | 498              | 56%    | 18,761              | 53%    | 3890                | 49%    | 2306                | 36%    | 620                 | 15%    | 103                | 4%     |
| b 150 to 500mg/g           | 18,028           | 31%    | 245              | 27%    | 11,537              | 33%    | 2517                | 32%    | 2228                | 34%    | 1199                | 30%    | 302                | 11%    |
| c >500mg/g                 | 13,195           | 23%    | 154              | 17%    | 5045                | 14%    | 1553                | 19%    | 1949                | 30%    | 2230                | 55%    | 2264               | 85%    |
| Any UA                     | 632,550          | 38%    | 82,531           | 12%    | 475,216             | 54%    | 44,258              | 60%    | 18,496              | 64%    | 7178                | 63%    | 4871               | 58%    |
| Num UA measurements        | 3.2              | 5.4    |                  |        | 3.4                 | 5.5    | 4.3                 | 6.9    | 5.2                 | 8.0    | 5.8                 | 9.5    | 5.7                | 10.9   |
| Most recent UA:            |                  |        |                  |        |                     |        |                     |        |                     |        |                     |        |                    |        |
| a Neg                      | 495,430          | 78%    | 64,949           | 79%    | 382,937             | 81%    | 32,576              | 74%    | 11,488              | 62%    | 2945                | 41%    | 535                | 11%    |
| b Trace to 30 (Trace, 1+)  | 99,432           | 16%    | 13,368           | 16%    | 70,862              | 15%    | 8060                | 18%    | 4251                | 23%    | 1906                | 27%    | 985                | 20%    |
| c 100 to >300 (2+, 3+, 4+) | 37,399           | 6%     | 4198             | 5%     | 21,244              | 5%     | 3594                | 8%     | 2728                | 15%    | 2300                | 32%    | 3335               | 69%    |
| Dialysis                   | 23,025           | 1%     | 3688             | 0.5%   | 4618                | 0.5%   | 3084                | 4%     | ,864                | 10%    | 2737                | 24%    | 6034               | 72%    |
| Transplant                 | 11,196           | 0.7%   | 666              | 0.1%   | 4091                | 0.5%   | 2359                | 3%     | 1947                | 7%     | 1104                | 10%    | 1029               | 12%    |

### Supplemental Figure 1: Correlation between Same-day UACR and UPCR Results at Three Sites Cleveland Clinic

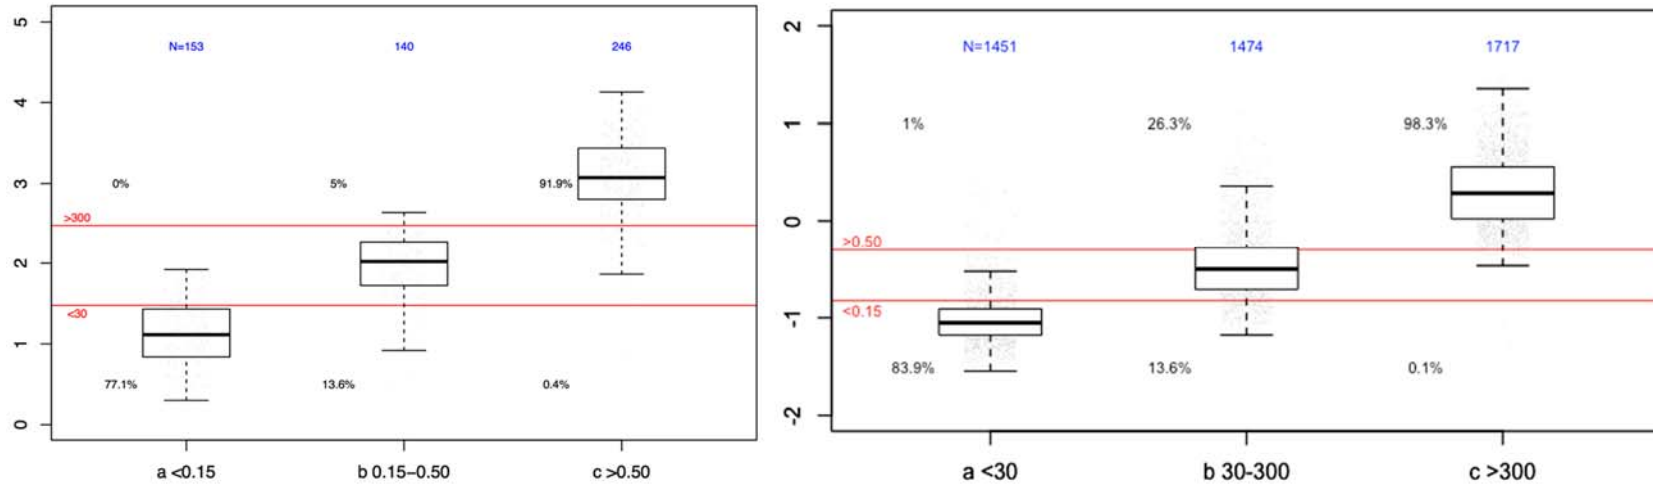

### Minnesota

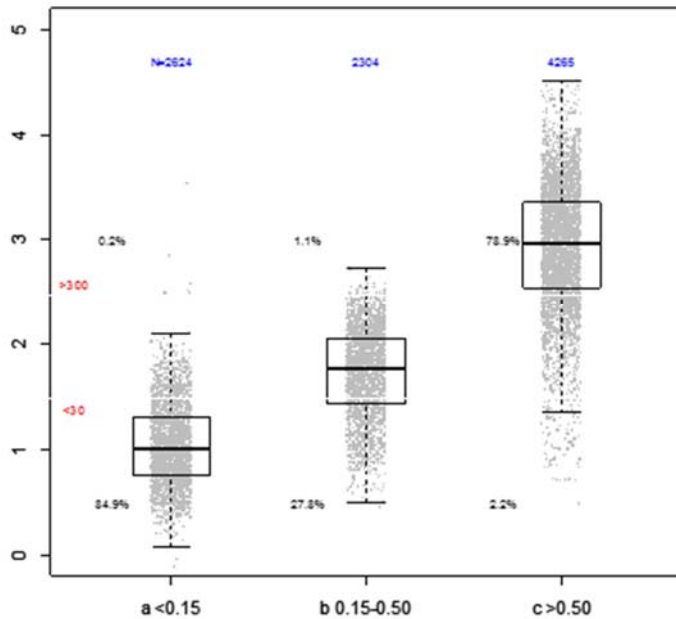

### Supplemental Figure 2: Correlation between Same-day UPCR and UA Results at Three Sites

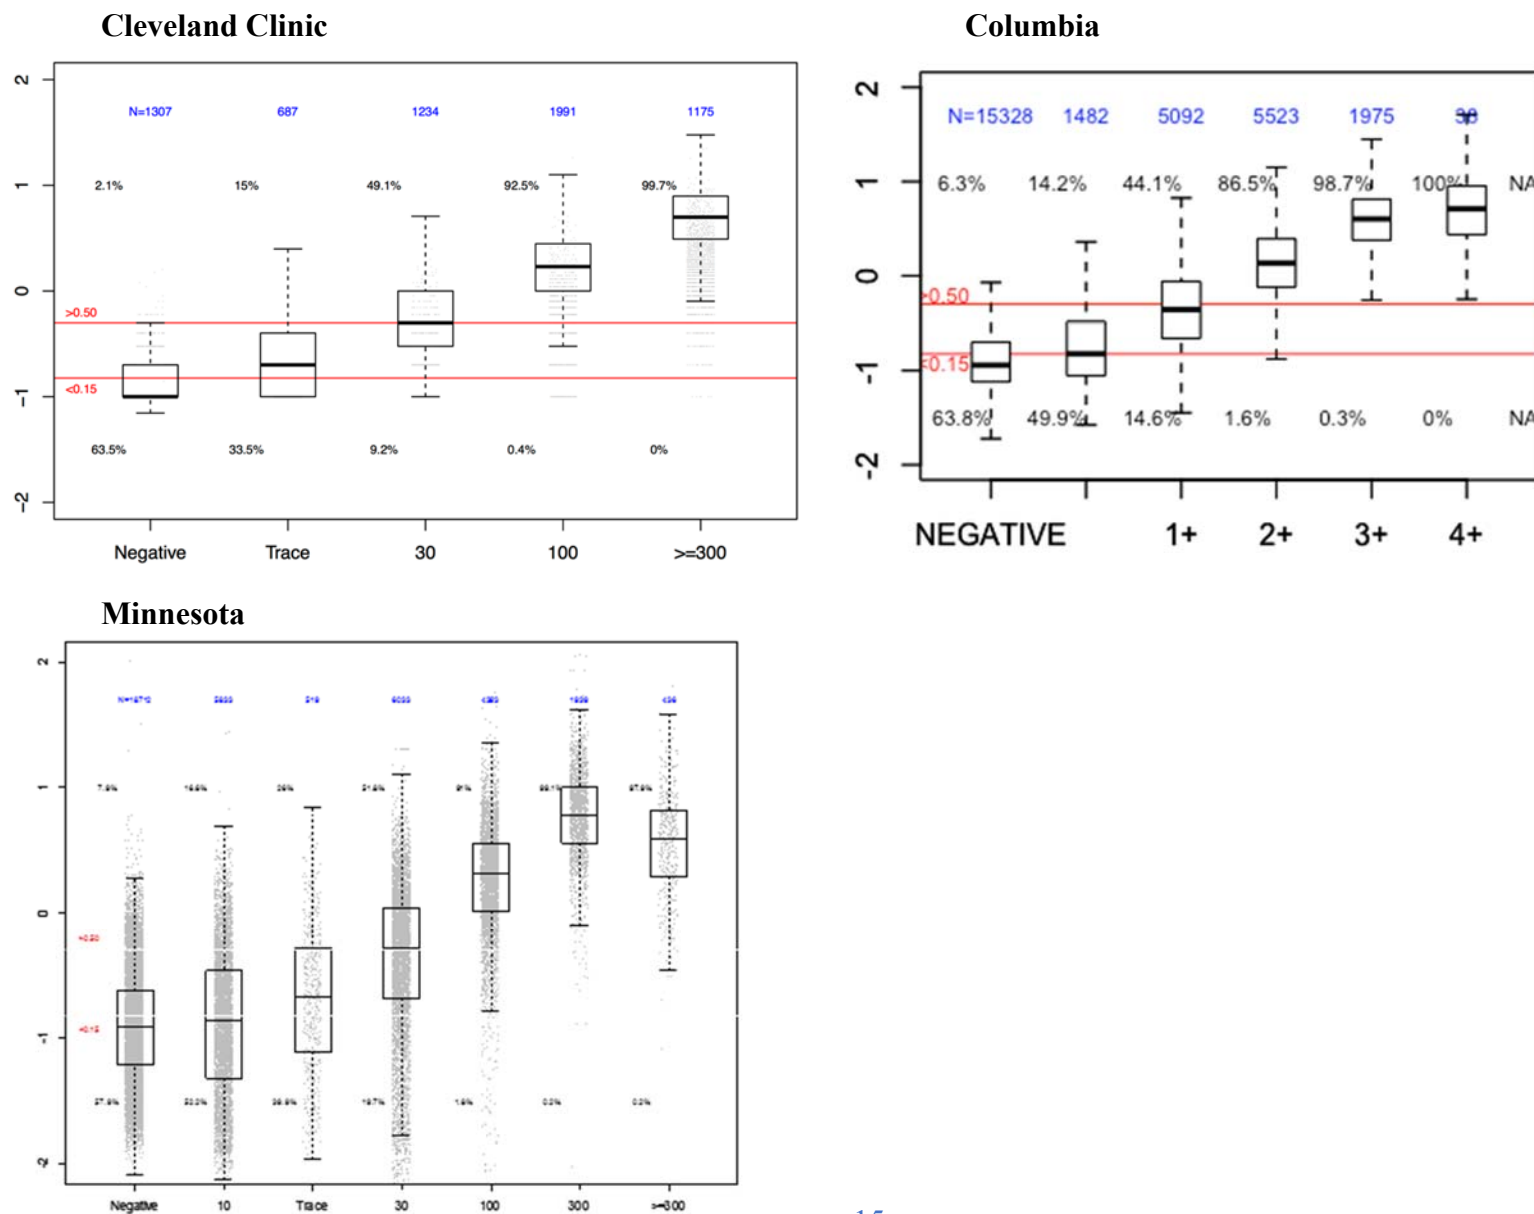

Supplement: CJN.00360119SupplementaryData.pdf [file CJN.00360119SupplementaryData.pdf]
